# Supplementary material for: NDRG2 suppression as a molecular hallmark of photoreceptor-specific cell death in the mouse retina
Source: PubMed Central journal article supplement (PMC6135825; doi:10.1038/s41420-018-0101-2), 2018-09-12
Supplement: 41420_2018_101_MOESM1_ESM.pdf [file 41420_2018_101_MOESM1_ESM.pdf]

## **Supplementary Information**

### **NDRG2 suppression as a molecular hallmark of photoreceptor-specific cell death in the mouse retina**

**Running Title:** NDRG2 contributes to photoreceptor homeostasis

Cheng-Biao Hu<sup>1,2,†</sup>, Bing-Dong Sui<sup>3,4,†</sup>, Bao-Ying Wang<sup>1,2,†</sup>, Gao Li<sup>4,5</sup>, Cheng-Hu Hu<sup>3,4</sup>, Chen-Xi Zheng<sup>3,4</sup>, Fang-Ying Du<sup>1,2</sup>, Chun-Hui Zhu<sup>1,2</sup>, Hong-Bo Li<sup>1,2</sup>, Yan Feng<sup>1,2</sup>, Yan Jin<sup>3,4,\*</sup> and Xiao-Rui Yu<sup>1,2,\*</sup>

<sup>1</sup> Department of Biochemistry and Molecular Biology, School of Basic Medical Sciences, Xi'an Jiaotong University Health Science Center, Xi'an, Shaanxi 710061, China.

<sup>2</sup> Key Laboratory of Environment and Genes Related to Diseases (Xi'an Jiaotong University), Ministry of Education, China.

<sup>3</sup> State Key Laboratory of Military Stomatology, Center for Tissue Engineering, Fourth Military Medical University, Xi'an, Shaanxi 710032, China.

<sup>4</sup> Xi'an Institute of Tissue Engineering and Regenerative Medicine, Xi'an, Shaanxi 710032, China.

<sup>5</sup> Department of stomatology, The people's Hospital of Zhangqiu City, Zhangqiu, Shandong 250200, China.

† These authors contributed equally to this work.

\* **Corresponding author**

**Prof. Xiao-Rui Yu**

Department of Biochemistry and Molecular Biology, School of Basic Medical Sciences, Xi'an Jiaotong

University Health Science Center, No. 76 West Yanta Road, Xi'an, Shaanxi 710061, China.

*E-mail: xiaoruiy@mail.xjtu.edu.cn; Tel/fax: +86-29-82655491.*

**Prof. Yan Jin**

State Key Laboratory of Military Stomatology, Center for Tissue Engineering, Fourth Military Medical University, No. 145 West Changle Road, Xi'an, Shaanxi 710032, China.

*E-mail: yanjin@fmmu.edu.cn; Tel: +86-29-84776472; Fax: +86-29-83218039.*

**Journal:** Cell Death and Disease.

**Supplementary information:** 4 Supplementary Figures and 1 Supplementary Table.

## Supplementary Figures and Legends

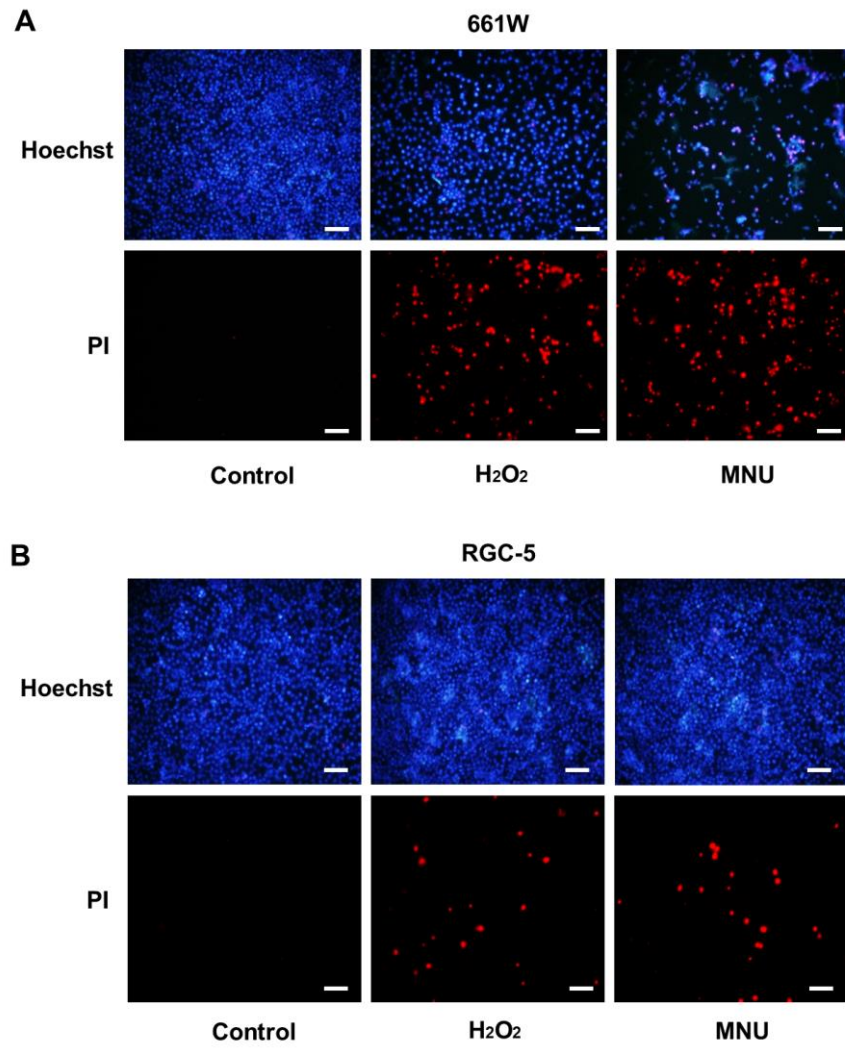

**Supplementary Figure 1. Analysis of retinal cell death.** Dead cells were positively stained by propidium iodide (PI) in the 661W (A) and RGC-5 (B) cell lines. Scale bar = 20  $\mu$ m.  $N = 3$  per group.

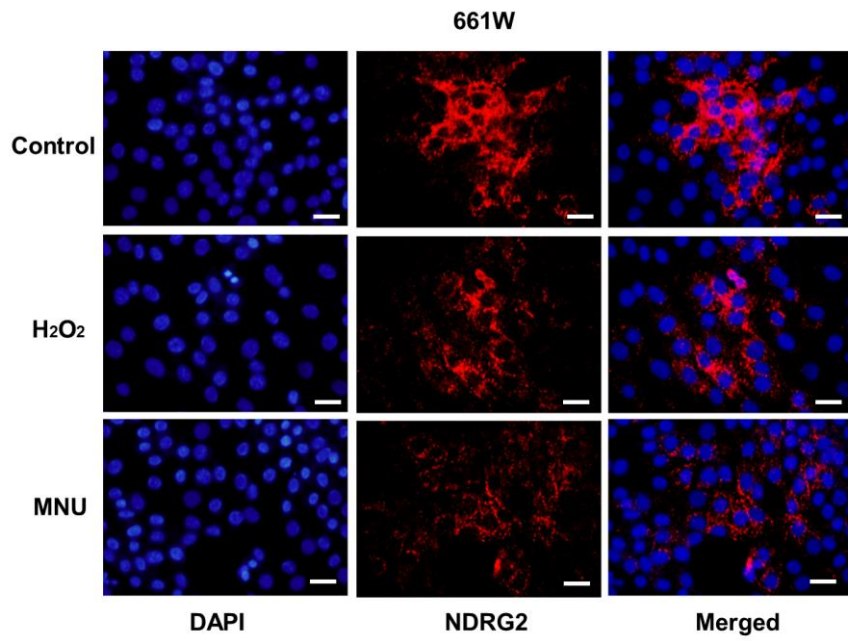

**Supplementary Figure 2. Immunofluorescent staining of NDRG2 in the 661W photoreceptor cell line.**

Scale bar = 2  $\mu$ m. *N* = 3 per group.

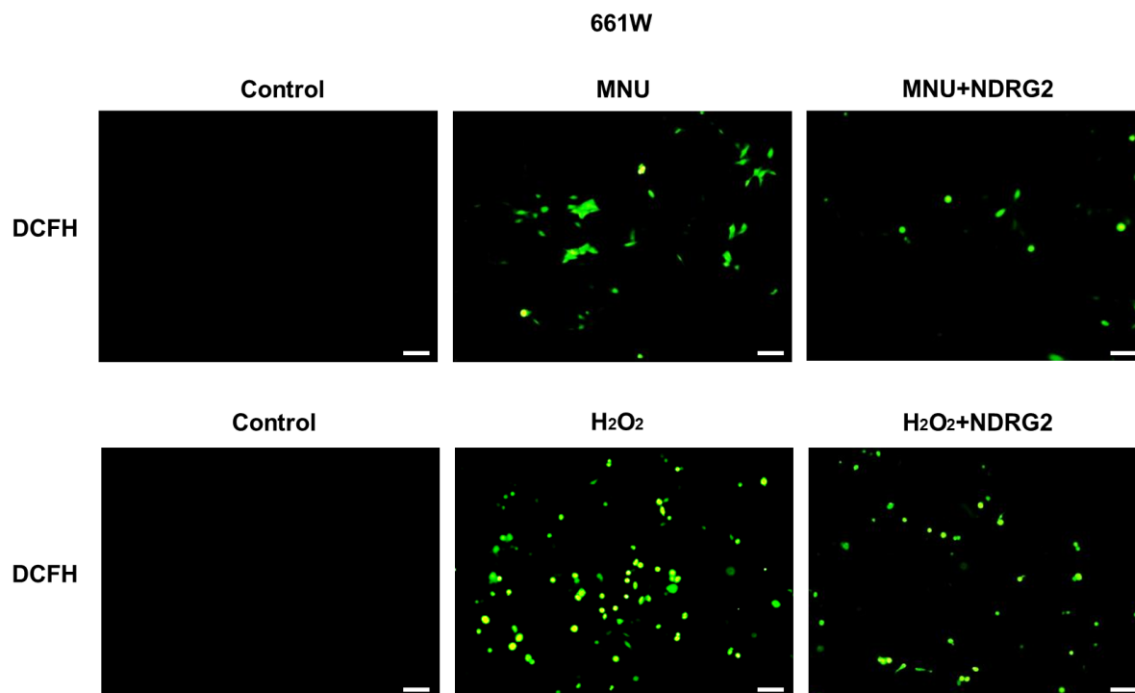

**Supplementary Figure 3. Contents of reactive oxygen species (ROS) in the 661W photoreceptor cell line.** 661W cells were overexpressed with NDRG2 in indicated groups. ROS was detected by the fluorescent dye Dichlorodihydrofluorescein Diacetate (DCFH). Scale bar = 1  $\mu$ m. *N* = 3 per group.

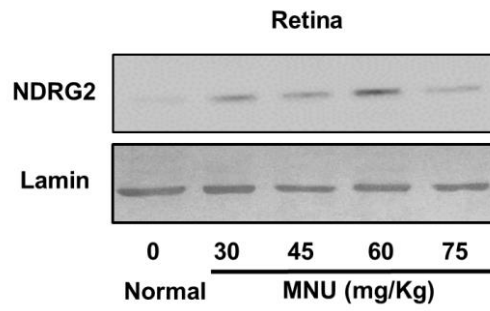

**Supplementary Figure 4. Nuclear protein expression level of NDRG2 in the retinal tissue.** Lamin was used as the internal control.

**Supplementary Table 1. Primer sequences in the present study.**

---

| Gene                            | Primer sequences                                                               |
|---------------------------------|--------------------------------------------------------------------------------|
| <i><math>\beta</math>-actin</i> | Forward: 5'-CTCTTTTCCAGCCTTCCTTCTT-3'<br>Reverse: 5'-GAGGTCTTTACGGATGTCAACG-3' |
| <i>NDRG1</i>                    | Forward: 5'-CCTCAACGACATGAACCCGA-3'<br>Reverse: 5'-TGCAAAGTGACAGTGTGGGT-3'     |
| <i>NDRG2</i>                    | Forward: 5'-CGCGATATGCTCTGAACCAC-3'<br>Reverse: 5'-TTCCTGGCTGAAAAGATGTCC-3'    |
| <i>NDRG3</i>                    | Forward: 5'-CCGTATGTGCAGCTCAGTCA-3'<br>Reverse: 5'-CTTGAGGTGGAGTGGGTTTCG-3'    |
| <i>NDRG4</i>                    | Forward: 5'-CAGCCATCCTCACCTACCAT-3'<br>Reverse: 5'-GTGGCACACCACAAAGTGTT-3'     |
| <i>Nrf2</i>                     | Forward: 5'-GGACATGGAGCAAGTTTGGC-3'<br>Reverse: 5'-CAGCGGTAGTATCAGCCAGC-3'     |
| <i>Ho-1</i>                     | Forward: 5'-TGACACCTGAGGTCAAGCAC-3'<br>Reverse: 5'-ATCTTGCACCAGGCTAGCAG-3'     |
| <i>Nqo1</i>                     | Forward: 5'-GGTAGCGGCTCCATGTACTC-3'<br>Reverse: 5'-CCAGACGGTTTCCAGACGTT-3'     |

---
